# Supplementary material for: The Classroom Discourse Observation Protocol (CDOP): A quantitative method for characterizing teacher discourse moves in undergraduate STEM learning environments
Source: PLOS journal article supplement (doi:10.1371/journal.pone.0219019), 2019-07-17
Supplement: S2 (10.1371/journal.pone.0219019.s002) [file journal.pone.0219019.s002]

Table S2. CDOP items as rated by experts for content validity

| Items                                 | Experts |   |   |   |   | CVI  |
|---------------------------------------|---------|---|---|---|---|------|
|                                       | 1       | 2 | 3 | 4 | 5 |      |
| Representativeness                    | 3       | 3 | 3 | 3 | 3 | 1.00 |
| Clarity and overall structure         | 3       | 3 | 1 | 3 | 3 | 0.80 |
| Tool usefulness                       | 3       | 3 | 3 | 3 | 3 | 1.00 |
| Comprehensiveness                     | 3       | 1 | 3 | 3 | 3 | 0.80 |
| Average Content Validity Index (CVI): |         |   |   |   |   | 0.90 |
